# Supplementary material
Source: ML conference proceedings conference paper supplement (https://openaccess.thecvf.com/content/WACV2024/html/Zhao_THInImg_Cross-Modal_Steganography_WACV_2024_paper.html)
Supplement: Supplementary file 1 [file Zhao_THInImg_Cross-Modal_Steganography_WACV_2024_supplemental.zip]

Supplementary Document

Anonymous WACV Algorithms Track submission

Paper ID 515

1. More Visual Results

In Fig. 1 we present more results obtained with the three methods. In addition, Fig. 2 and Fig. 3 show the results of hiding different length of audio data in our base single-layer system for the LJ Speech database and the CMU-ARCTIC database [1]. The iterative hiding results of the double nested hidden architecture is shown in Fig. 4.

2. Details of User Study

The rating results by each user are shown in Tab. 1~Tab. 3, which represent the scores of the results obtained by baseline (raw audio data), STFT and compression respectively.

3. Decoded Video and Audio Results

We show the video and audio results of each experiment in the folder named Results, in which the folder named single-layer and double-layer denote the results for the

base system and the double nested hidden architecture, respectively. For fair comparison, we chose the same facial image as input for each experiment. The file names in single-layer are: the results form the range the format of the method, e.g. video\_0-10\_mel.mp4, audio\_0-10\_mel.wav and container image\_0-10\_mel.png are the video result, the audio result and the corresponding container image. Similarly, the files in double-layer are: the results form the range the N layer, e.g. video\_0-20\_first-layer.mp4, video\_0-20\_second-layer.mp4, audio\_0-20\_first-layer.wav, audio\_0-20\_second-layer.wav and container image\_0-20.png are the video, the audio and the corresponding container image for both layers.

References

[1] John Kominek and Alan W Black. The CMU arctic speech databases. In *Fifth ISCA workshop on speech synthesis*, 2004. 1, 3

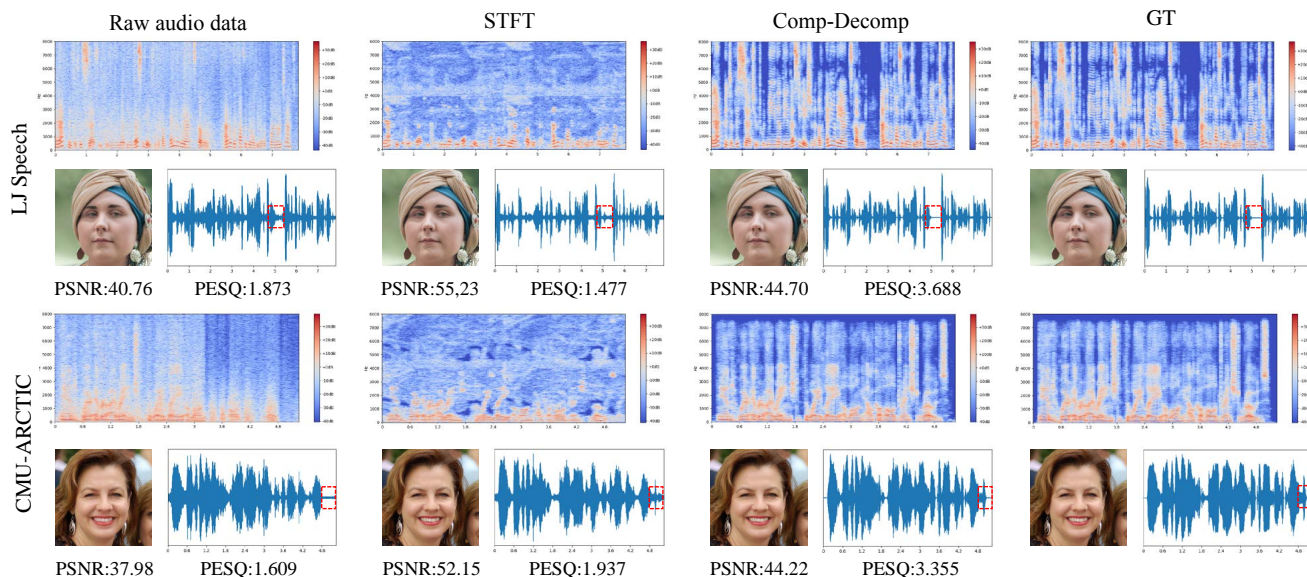

Figure 1. The visual results of container images and recovered audio from different methods.

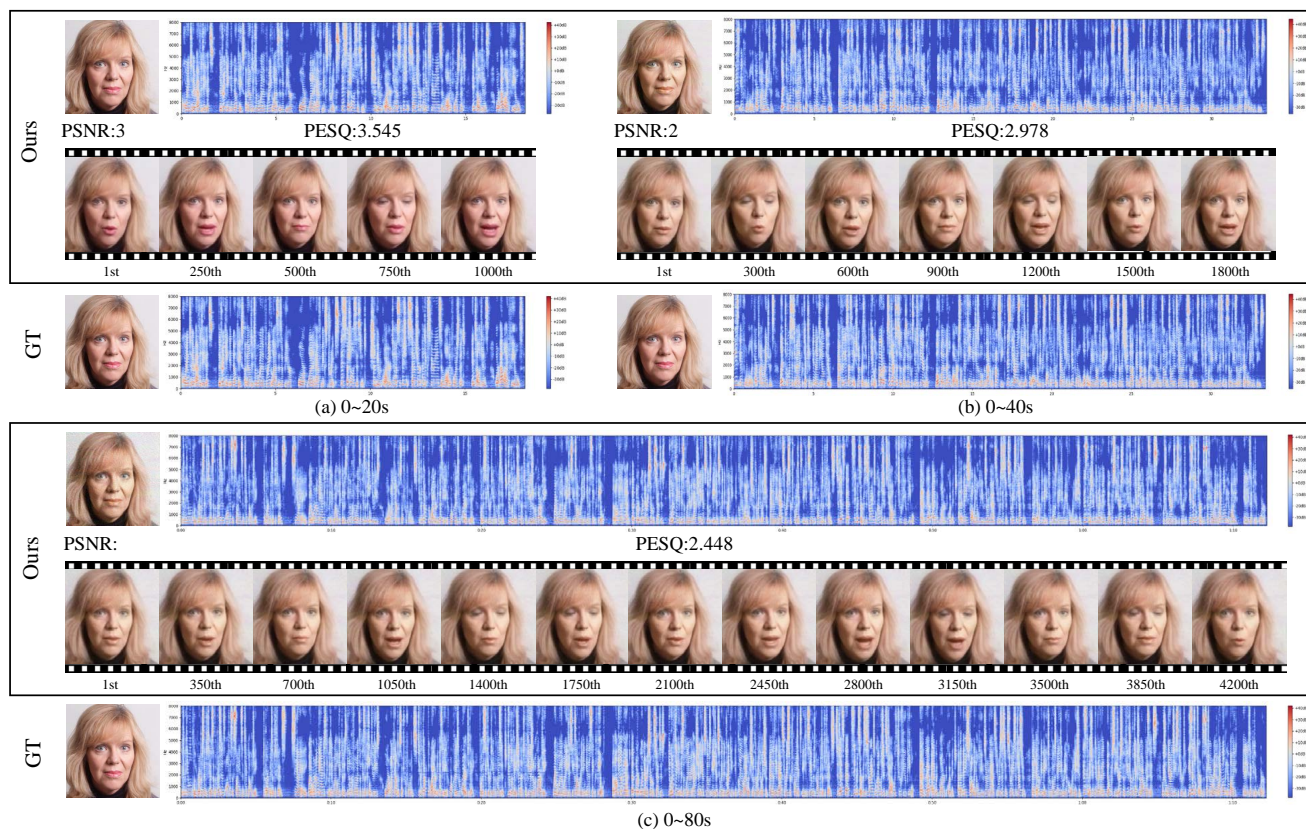

Figure 2. The decoded audio and video frames corresponding to different audio lengths in the LJ Speech database.

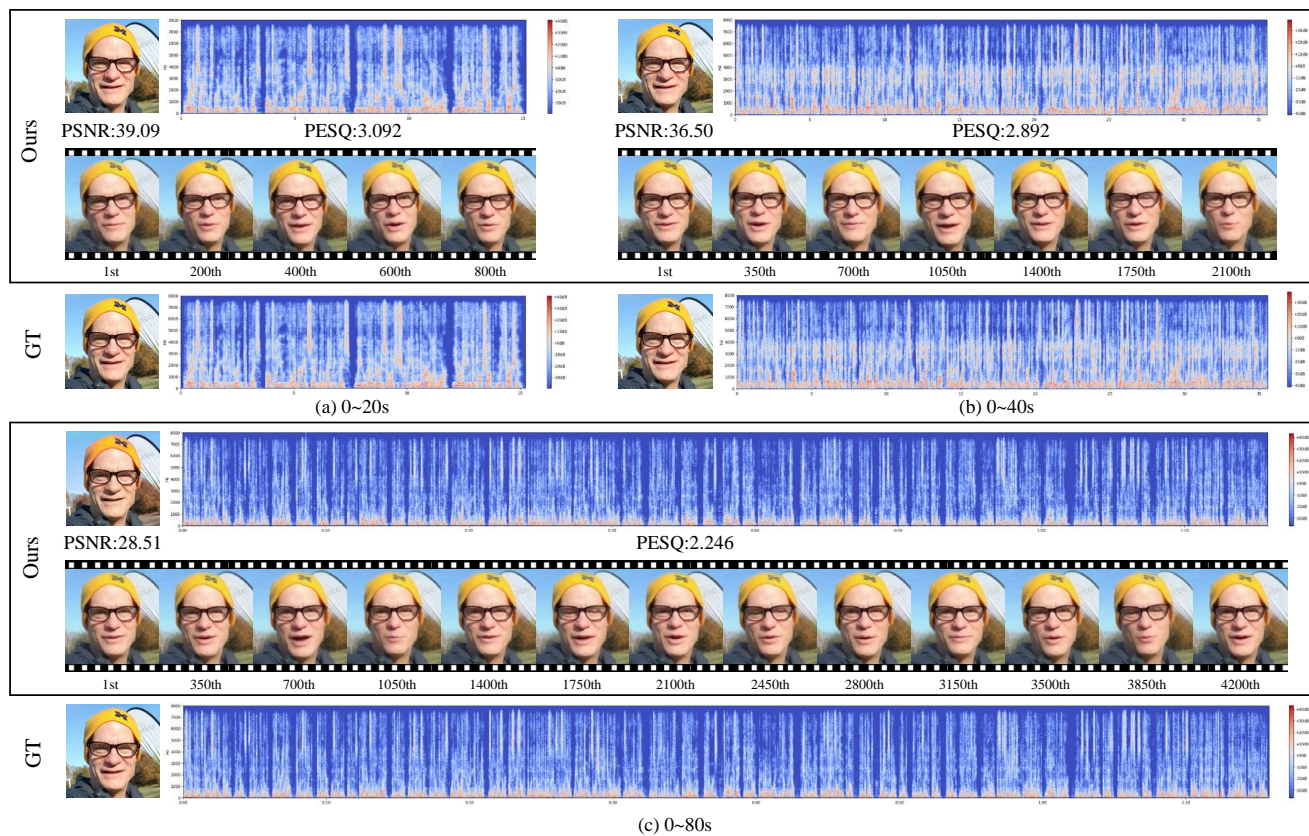

Figure 3. The decoded audio and video frames corresponding to different audio lengths in the CMU-ARCTIC database [1].

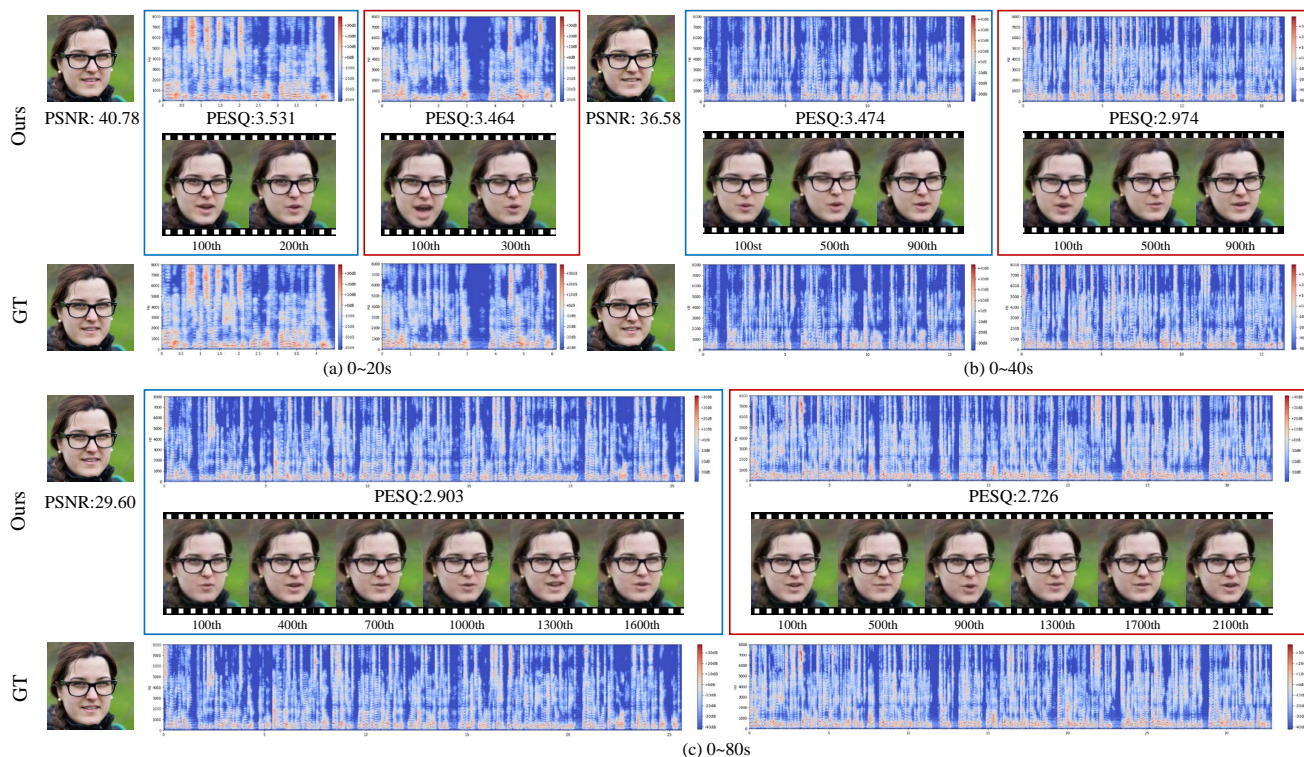

Figure 4. Visual results of the double-layer nested hidden architecture in hiding different ranges of audio lengths.

| $\begin{smallmatrix} V \\ U \end{smallmatrix}$ | v1  | v2  | v3  | v4  | v5  | v6  | v7  | v8  | v9  | v10 | v11 | v12 | v13 | v14 | v15 | v16 | v17 | v18 | v19 | v20 |
|------------------------------------------------|-----|-----|-----|-----|-----|-----|-----|-----|-----|-----|-----|-----|-----|-----|-----|-----|-----|-----|-----|-----|
| u1                                             | 4.0 | 3.0 | 4.0 | 4.0 | 3.5 | 4.0 | 4.0 | 4.0 | 3.0 | 3.0 | 4.0 | 2.5 | 4.0 | 4.0 | 4.0 | 4.0 | 4.0 | 3.5 | 4.0 | 3.5 |
| u2                                             | 2.5 | 3.0 | 3.0 | 3.0 | 3.0 | 3.0 | 2.5 | 3.0 | 2.5 | 3.0 | 3.0 | 2.0 | 3.5 | 3.0 | 3.0 | 3.0 | 3.0 | 2.5 | 3.0 | 2.5 |
| u3                                             | 3.0 | 3.5 | 2.5 | 3.0 | 2.5 | 3.0 | 3.0 | 3.5 | 3.0 | 3.0 | 4.0 | 0.5 | 4.0 | 3.0 | 3.5 | 4.0 | 4.0 | 3.5 | 4.0 | 4.0 |
| u4                                             | 3.5 | 3.0 | 3.0 | 3.5 | 3.5 | 3.5 | 3.5 | 4.0 | 1.0 | 3.5 | 3.5 | 0.0 | 4.5 | 3.5 | 3.0 | 4.0 | 4.5 | 3.0 | 4.0 | 2.0 |
| u5                                             | 1.0 | 0.0 | 0.5 | 1.0 | 0.0 | 1.0 | 0.0 | 1.0 | 0.5 | 1.0 | 3.0 | 0.0 | 4.0 | 1.0 | 1.0 | 0.0 | 1.0 | 0.0 | 1.0 | 2.0 |
| u6                                             | 3.5 | 3.0 | 3.5 | 3.0 | 4.0 | 3.0 | 3.5 | 2.5 | 4.0 | 3.5 | 2.5 | 3.5 | 3.5 | 3.0 | 4.0 | 4.0 | 3.5 | 3.5 | 3.5 | 4.0 |
| u7                                             | 4.0 | 3.5 | 3.5 | 3.0 | 3.5 | 3.5 | 3.0 | 4.0 | 2.5 | 3.5 | 3.5 | 2.5 | 4.0 | 3.5 | 3.5 | 3.5 | 3.5 | 3.0 | 3.5 | 3.5 |
| u8                                             | 2.0 | 1.5 | 2.0 | 2.0 | 2.0 | 1.5 | 1.5 | 1.5 | 1.0 | 2.0 | 1.5 | 1.0 | 1.5 | 1.5 | 1.5 | 2.0 | 1.5 | 2.0 | 1.5 | 1.5 |
| u9                                             | 2.5 | 2.0 | 2.0 | 2.0 | 1.5 | 2.0 | 1.5 | 2.5 | 2.0 | 3.0 | 3.0 | 1.5 | 3.0 | 3.0 | 2.0 | 2.0 | 2.0 | 3.0 | 1.0 | 3.5 |
| u10                                            | 2.0 | 2.0 | 2.5 | 3.0 | 3.0 | 2.0 | 1.5 | 3.0 | 1.5 | 2.0 | 2.0 | 1.5 | 4.0 | 3.0 | 3.0 | 4.0 | 2.0 | 1.5 | 2.5 | 2.0 |
| u11                                            | 2.0 | 1.0 | 1.0 | 1.0 | 1.5 | 1.0 | 1.0 | 2.0 | 1.5 | 3.0 | 3.0 | 1.0 | 3.0 | 2.5 | 1.0 | 3.0 | 1.0 | 2.5 | 3.0 | 3.0 |
| u12                                            | 2.0 | 1.5 | 2.0 | 2.5 | 3.0 | 2.5 | 1.5 | 1.5 | 1.0 | 1.5 | 2.0 | 1.0 | 3.5 | 2.0 | 1.0 | 2.5 | 1.5 | 1.0 | 2.0 | 2.0 |
| u13                                            | 0.5 | 0.0 | 0.0 | 0.5 | 1.0 | 0.5 | 0.0 | 0.5 | 0.0 | 1.0 | 1.0 | 0.0 | 1.5 | 1.5 | 0.5 | 0.5 | 0.5 | 0.0 | 0.5 | 0.0 |
| u14                                            | 3.0 | 2.0 | 3.0 | 3.0 | 3.0 | 3.0 | 2.0 | 3.0 | 2.0 | 3.0 | 3.0 | 1.0 | 3.0 | 2.0 | 3.5 | 2.0 | 3.0 | 2.5 | 3.5 | 3.0 |
| u15                                            | 1.5 | 1.0 | 1.0 | 1.5 | 2.0 | 1.5 | 1.0 | 1.0 | 0.5 | 1.5 | 1.5 | 0.5 | 2.5 | 2.0 | 1.0 | 1.5 | 1.0 | 0.5 | 1.5 | 1.0 |
| u16                                            | 2.5 | 1.5 | 1.5 | 3.0 | 3.0 | 3.0 | 2.0 | 2.5 | 0.5 | 1.0 | 1.5 | 0.5 | 2.5 | 1.5 | 1.5 | 3.5 | 1.5 | 1.0 | 3.0 | 2.0 |
| u17                                            | 2.0 | 2.0 | 1.0 | 2.0 | 1.0 | 2.0 | 3.0 | 2.0 | 1.0 | 1.0 | 2.0 | 2.0 | 2.0 | 1.0 | 1.0 | 2.0 | 1.0 | 1.0 | 2.0 | 1.0 |
| u18                                            | 2.0 | 1.0 | 2.0 | 3.0 | 3.0 | 2.0 | 1.0 | 1.0 | 1.0 | 2.0 | 2.0 | 1.0 | 3.0 | 2.0 | 1.0 | 2.0 | 2.0 | 1.0 | 2.0 | 2.0 |
| u19                                            | 4.0 | 4.0 | 3.5 | 3.5 | 4.0 | 4.0 | 4.0 | 4.0 | 2.5 | 3.5 | 4.0 | 2.0 | 3.5 | 3.5 | 3.5 | 3.5 | 2.5 | 1.5 | 2.5 | 2.0 |
| u20                                            | 3.0 | 2.0 | 3.0 | 3.0 | 3.0 | 3.5 | 3.0 | 3.5 | 2.0 | 3.0 | 3.5 | 2.0 | 3.5 | 3.0 | 2.5 | 3.0 | 2.0 | 1.0 | 3.0 | 2.5 |
| u21                                            | 3.5 | 4.0 | 4.0 | 4.0 | 4.0 | 4.0 | 4.0 | 4.0 | 4.5 | 4.5 | 4.5 | 4.5 | 4.0 | 4.5 | 4.0 | 4.5 | 4.5 | 4.0 | 4.5 | 4.5 |
| u22                                            | 3.0 | 2.0 | 2.0 | 3.5 | 3.0 | 2.0 | 1.5 | 2.0 | 1.5 | 3.0 | 2.5 | 1.5 | 3.0 | 2.0 | 3.0 | 2.5 | 2.0 | 2.0 | 3.0 | 2.5 |
| u23                                            | 3.0 | 1.5 | 1.0 | 2.0 | 2.5 | 2.5 | 0.5 | 0.5 | 0.5 | 0.5 | 2.5 | 0.5 | 2.0 | 2.5 | 2.0 | 4.0 | 2.0 | 1.0 | 2.5 | 2.5 |
| u24                                            | 3.5 | 3.0 | 3.5 | 3.5 | 3.5 | 3.5 | 3.0 | 3.5 | 2.5 | 3.0 | 3.0 | 2.5 | 3.5 | 2.5 | 3.0 | 3.5 | 3.0 | 2.5 | 3.5 | 3.5 |
| u25                                            | 3.0 | 2.5 | 3.0 | 3.5 | 3.0 | 3.0 | 2.5 | 2.0 | 2.5 | 3.0 | 2.5 | 2.0 | 3.0 | 3.5 | 2.5 | 4.0 | 3.0 | 2.5 | 3.0 | 2.5 |
| u26                                            | 3.5 | 3.0 | 2.5 | 2.5 | 3.0 | 3.0 | 1.5 | 3.0 | 2.5 | 3.0 | 2.5 | 1.5 | 3.0 | 3.5 | 4.0 | 4.5 | 1.5 | 1.0 | 2.5 | 2.5 |
| u27                                            | 3.5 | 2.5 | 3.0 | 3.5 | 3.0 | 4.0 | 3.5 | 3.5 | 1.0 | 3.0 | 3.0 | 2.0 | 2.0 | 3.0 | 2.0 | 3.5 | 3.0 | 1.0 | 3.5 | 3.5 |
| u28                                            | 3.0 | 2.0 | 3.0 | 3.0 | 4.0 | 3.0 | 3.0 | 3.0 | 3.0 | 4.0 | 4.0 | 2.0 | 4.0 | 3.0 | 3.0 | 2.0 | 2.0 | 3.0 | 3.0 | 4.0 |
| u29                                            | 3.5 | 3.0 | 3.5 | 3.5 | 3.5 | 3.5 | 3.0 | 3.0 | 2.5 | 3.0 | 3.5 | 2.0 | 3.0 | 2.5 | 2.5 | 2.5 | 2.5 | 2.5 | 2.5 | 3.0 |
| u30                                            | 2.0 | 1.0 | 1.5 | 1.5 | 2.0 | 2.0 | 2.5 | 1.5 | 3.0 | 1.0 | 3.0 | 1.0 | 2.0 | 2.5 | 2.0 | 2.0 | 1.0 | 2.0 | 3.0 | 2.5 |

Table 1. The scores for the generated audio-visual results of the baseline method. "v1~v20" are the 20 videos, and "u1~u30" represent the 30 users.

| $\begin{matrix} V \\ U \end{matrix}$ | v1  | v2  | v3  | v4  | v5  | v6  | v7  | v8  | v9  | v10 | v11 | v12 | v13 | v14 | v15 | v16 | v17 | v18 | v19 | v20 |
|--------------------------------------|-----|-----|-----|-----|-----|-----|-----|-----|-----|-----|-----|-----|-----|-----|-----|-----|-----|-----|-----|-----|
| u1                                   | 2.5 | 2.5 | 3.5 | 4.0 | 3.5 | 4.0 | 4.0 | 3.5 | 3.0 | 2.5 | 3.5 | 2.5 | 4.0 | 4.0 | 4.0 | 3.0 | 3.0 | 3.0 | 3.0 | 4.0 |
| u2                                   | 3.0 | 2.5 | 2.5 | 3.0 | 2.5 | 2.5 | 2.5 | 3.0 | 2.5 | 2.5 | 3.0 | 2.5 | 3.5 | 3.0 | 3.0 | 3.5 | 3.0 | 3.0 | 3.0 | 3.0 |
| u3                                   | 2.0 | 1.5 | 1.5 | 0.5 | 2.0 | 1.0 | 2.0 | 4.0 | 2.5 | 2.5 | 4.5 | 1.0 | 3.5 | 2.5 | 3.0 | 3.5 | 3.5 | 3.0 | 3.5 | 3.5 |
| u4                                   | 3.0 | 2.0 | 1.5 | 3.0 | 3.0 | 3.0 | 3.0 | 4.0 | 3.0 | 3.5 | 4.0 | 0.5 | 4.0 | 3.0 | 2.5 | 4.0 | 4.0 | 3.5 | 4.0 | 3.0 |
| u5                                   | 1.0 | 0.0 | 0.0 | 1.0 | 0.0 | 1.0 | 0.0 | 1.5 | 2.0 | 0.0 | 3.0 | 0.0 | 4.0 | 1.0 | 1.0 | 0.0 | 1.0 | 1.0 | 0.0 | 1.0 |
| u6                                   | 3.0 | 2.5 | 3.0 | 2.5 | 3.5 | 3.0 | 3.5 | 2.0 | 3.5 | 3.0 | 2.0 | 3.5 | 2.5 | 2.5 | 3.0 | 3.0 | 3.5 | 3.0 | 3.0 | 4.0 |
| u7                                   | 2.5 | 2.0 | 2.0 | 2.5 | 3.0 | 2.5 | 2.5 | 3.5 | 2.5 | 3.0 | 3.5 | 2.5 | 3.0 | 3.0 | 2.5 | 3.5 | 3.0 | 2.5 | 3.0 | 3.5 |
| u8                                   | 2.0 | 2.0 | 2.0 | 2.0 | 2.0 | 2.0 | 2.0 | 2.0 | 1.5 | 2.0 | 2.0 | 1.0 | 2.0 | 2.0 | 2.0 | 2.0 | 1.5 | 2.0 | 2.0 | 2.0 |
| u9                                   | 2.0 | 2.5 | 2.0 | 2.5 | 2.0 | 2.0 | 2.0 | 3.0 | 2.0 | 2.0 | 3.0 | 2.5 | 2.5 | 2.5 | 2.5 | 3.5 | 2.0 | 2.0 | 3.0 | 3.0 |
| u10                                  | 1.0 | 0.5 | 0.5 | 0.5 | 0.5 | 0.5 | 0.5 | 0.5 | 1.0 | 1.0 | 1.0 | 0.5 | 1.5 | 0.0 | 0.5 | 0.5 | 0.5 | 0.5 | 0.5 | 0.5 |
| u11                                  | 3.0 | 2.0 | 2.5 | 2.0 | 2.5 | 3.0 | 2.0 | 4.0 | 3.0 | 3.0 | 4.0 | 3.0 | 4.0 | 3.5 | 3.0 | 3.0 | 2.5 | 3.5 | 4.0 | 3.5 |
| u12                                  | 3.0 | 1.5 | 1.5 | 1.5 | 1.5 | 1.5 | 1.5 | 1.5 | 1.0 | 1.5 | 2.0 | 1.0 | 3.5 | 2.0 | 1.5 | 2.5 | 1.0 | 1.5 | 2.0 | 2.0 |
| u13                                  | 1.0 | 0.5 | 1.0 | 1.0 | 1.5 | 1.0 | 1.0 | 1.5 | 0.5 | 0.5 | 2.0 | 1.5 | 3.5 | 2.0 | 1.5 | 1.5 | 1.5 | 1.0 | 1.5 | 1.5 |
| u14                                  | 3.0 | 2.0 | 2.0 | 2.0 | 2.0 | 2.0 | 2.0 | 3.0 | 2.0 | 2.0 | 2.0 | 1.0 | 3.0 | 2.0 | 3.5 | 3.0 | 2.5 | 2.0 | 3.0 | 3.0 |
| u15                                  | 2.0 | 1.0 | 1.5 | 1.5 | 1.5 | 1.5 | 1.5 | 1.5 | 1.0 | 1.0 | 2.0 | 1.5 | 3.5 | 2.0 | 1.5 | 2.0 | 1.5 | 1.5 | 2.0 | 2.0 |
| u16                                  | 3.0 | 1.0 | 1.0 | 2.5 | 2.0 | 2.5 | 2.0 | 2.0 | 1.0 | 2.0 | 2.0 | 2.0 | 3.0 | 2.0 | 2.5 | 3.5 | 2.0 | 2.0 | 3.0 | 3.0 |
| u17                                  | 3.0 | 3.5 | 3.0 | 3.0 | 2.0 | 3.0 | 4.0 | 3.0 | 3.0 | 2.0 | 3.0 | 2.0 | 2.0 | 3.0 | 2.0 | 2.0 | 3.0 | 2.0 | 2.0 | 2.0 |
| u18                                  | 2.0 | 1.0 | 1.0 | 2.0 | 1.0 | 1.0 | 2.0 | 1.0 | 1.0 | 2.0 | 2.0 | 1.0 | 3.0 | 2.0 | 2.0 | 2.0 | 1.0 | 1.0 | 2.0 | 2.0 |
| u19                                  | 3.0 | 3.0 | 3.0 | 3.5 | 2.0 | 3.5 | 4.0 | 4.0 | 2.5 | 3.5 | 4.5 | 2.5 | 4.0 | 3.5 | 3.5 | 4.0 | 2.5 | 2.0 | 2.5 | 3.0 |
| u20                                  | 2.5 | 3.0 | 2.0 | 1.5 | 1.5 | 2.0 | 1.5 | 2.5 | 1.5 | 2.0 | 3.0 | 1.0 | 2.5 | 2.0 | 2.5 | 2.5 | 3.0 | 2.0 | 2.5 | 3.5 |
| u21                                  | 4.0 | 4.0 | 4.0 | 4.0 | 4.0 | 4.0 | 4.0 | 4.0 | 4.0 | 4.0 | 4.0 | 3.5 | 4.5 | 4.0 | 4.0 | 4.5 | 4.5 | 4.0 | 4.5 | 4.5 |
| u22                                  | 3.5 | 2.5 | 3.0 | 3.5 | 3.0 | 3.0 | 3.0 | 3.0 | 2.5 | 3.0 | 3.5 | 3.0 | 4.0 | 3.5 | 3.5 | 3.5 | 2.5 | 3.5 | 4.0 | 3.5 |
| u23                                  | 4.0 | 2.5 | 3.0 | 3.0 | 3.5 | 2.5 | 2.0 | 3.0 | 1.5 | 1.0 | 3.0 | 0.5 | 3.0 | 3.0 | 3.0 | 4.5 | 2.5 | 2.0 | 3.0 | 3.0 |
| u24                                  | 3.5 | 3.0 | 3.0 | 3.0 | 3.0 | 3.0 | 3.5 | 3.5 | 2.5 | 2.5 | 3.0 | 2.0 | 3.0 | 2.5 | 2.5 | 3.0 | 2.5 | 2.0 | 3.0 | 3.0 |
| u25                                  | 3.0 | 2.5 | 3.0 | 3.0 | 2.5 | 2.5 | 2.5 | 2.0 | 2.5 | 3.5 | 3.0 | 2.0 | 3.0 | 3.0 | 3.0 | 3.5 | 2.5 | 2.5 | 2.5 | 2.5 |
| u26                                  | 3.0 | 2.5 | 2.0 | 3.0 | 3.5 | 2.5 | 2.0 | 3.5 | 3.0 | 2.5 | 3.5 | 1.0 | 2.5 | 2.0 | 3.0 | 3.5 | 2.0 | 3.5 | 1.0 | 2.0 |
| u27                                  | 2.0 | 3.0 | 3.0 | 4.5 | 2.0 | 3.0 | 2.5 | 4.0 | 2.5 | 4.0 | 3.5 | 2.0 | 3.0 | 2.0 | 3.5 | 3.0 | 4.0 | 3.0 | 2.5 | 2.5 |
| u28                                  | 4.0 | 2.0 | 4.0 | 2.0 | 3.0 | 2.0 | 3.0 | 4.0 | 3.0 | 3.0 | 4.0 | 2.0 | 4.0 | 2.0 | 3.0 | 2.0 | 3.0 | 2.0 | 2.0 | 3.0 |
| u29                                  | 4.0 | 3.5 | 3.5 | 3.0 | 3.0 | 3.0 | 3.0 | 3.0 | 2.5 | 3.0 | 3.5 | 2.0 | 3.0 | 2.5 | 2.5 | 2.5 | 2.5 | 2.5 | 2.5 | 3.0 |
| u30                                  | 3.0 | 2.0 | 2.0 | 1.0 | 2.5 | 2.0 | 2.0 | 1.5 | 2.0 | 1.0 | 2.5 | 1.0 | 1.5 | 2.0 | 1.0 | 1.5 | 1.5 | 2.0 | 2.5 | 3.5 |

Table 2. The scores for the audio-visual results of the STFT method.

| $\begin{matrix} V \\ U \end{matrix}$ | v1  | v2  | v3  | v4  | v5  | v6  | v7  | v8  | v9  | v10 | v11 | v12 | v13 | v14 | v15 | v16 | v17 | v18 | v19 | v20 |
|--------------------------------------|-----|-----|-----|-----|-----|-----|-----|-----|-----|-----|-----|-----|-----|-----|-----|-----|-----|-----|-----|-----|
| u1                                   | 5.0 | 5.0 | 5.0 | 3.5 | 5.0 | 5.0 | 5.0 | 3.5 | 5.0 | 5.0 | 5.0 | 5.0 | 5.0 | 4.0 | 4.5 | 5.0 | 5.0 | 4.5 | 5.0 | 5.0 |
| u2                                   | 5.0 | 5.0 | 3.5 | 5.0 | 5.0 | 5.0 | 4.5 | 5.0 | 5.0 | 4.0 | 5.0 | 4.5 | 5.0 | 5.0 | 5.0 | 5.0 | 4.0 | 5.0 | 5.0 | 3.5 |
| u3                                   | 5.0 | 4.5 | 5.0 | 5.0 | 5.0 | 4.5 | 4.0 | 5.0 | 4.5 | 4.5 | 5.0 | 3.5 | 4.0 | 4.0 | 4.0 | 4.0 | 5.0 | 4.0 | 5.0 | 4.5 |
| u4                                   | 5.0 | 4.5 | 4.5 | 5.0 | 4.5 | 5.0 | 4.5 | 4.5 | 4.0 | 4.5 | 5.0 | 4.5 | 4.5 | 4.5 | 4.5 | 4.5 | 5.0 | 5.0 | 5.0 | 5.0 |
| u5                                   | 2.0 | 2.5 | 3.0 | 4.0 | 2.0 | 4.0 | 1.0 | 4.0 | 4.0 | 3.0 | 3.5 | 2.0 | 5.0 | 4.0 | 3.0 | 1.0 | 4.0 | 4.5 | 2.0 | 3.0 |
| u6                                   | 5.0 | 5.0 | 5.0 | 5.0 | 5.0 | 5.0 | 5.0 | 5.0 | 5.0 | 5.0 | 5.0 | 5.0 | 5.0 | 5.0 | 5.0 | 5.0 | 5.0 | 5.0 | 5.0 | 5.0 |
| u7                                   | 5.0 | 5.0 | 5.0 | 5.0 | 5.0 | 5.0 | 5.0 | 5.0 | 5.0 | 5.0 | 5.0 | 5.0 | 5.0 | 5.0 | 5.0 | 5.0 | 5.0 | 5.0 | 5.0 | 5.0 |
| u8                                   | 3.0 | 3.0 | 5.0 | 3.5 | 3.0 | 3.0 | 3.5 | 5.0 | 3.0 | 3.0 | 3.5 | 2.0 | 3.0 | 2.5 | 3.0 | 3.5 | 2.0 | 2.5 | 3.0 | 3.5 |
| u9                                   | 4.5 | 4.0 | 4.0 | 5.0 | 3.0 | 4.0 | 3.5 | 4.5 | 5.0 | 5.0 | 3.5 | 3.0 | 3.0 | 5.0 | 3.0 | 5.0 | 3.0 | 4.5 | 3.5 | 4.5 |
| u10                                  | 5.0 | 5.0 | 5.0 | 5.0 | 5.0 | 5.0 | 5.0 | 5.0 | 5.0 | 5.0 | 5.0 | 5.0 | 5.0 | 5.0 | 5.0 | 5.0 | 5.0 | 5.0 | 5.0 | 5.0 |
| u11                                  | 4.0 | 3.5 | 4.5 | 3.0 | 4.0 | 4.5 | 4.5 | 5.0 | 4.0 | 4.0 | 4.5 | 4.0 | 5.0 | 5.0 | 4.5 | 3.5 | 3.0 | 4.5 | 4.5 | 4.0 |
| u12                                  | 4.5 | 4.5 | 5.0 | 5.0 | 5.0 | 4.5 | 4.0 | 3.5 | 3.5 | 4.5 | 4.0 | 3.5 | 5.0 | 4.5 | 4.5 | 5.0 | 5.0 | 4.5 | 5.0 | 5.0 |
| u13                                  | 5.0 | 5.0 | 5.0 | 5.0 | 5.0 | 5.0 | 5.0 | 5.0 | 5.0 | 5.0 | 5.0 | 5.0 | 5.0 | 5.0 | 5.0 | 5.0 | 5.0 | 5.0 | 5.0 | 5.0 |
| u14                                  | 4.0 | 4.0 | 4.0 | 4.0 | 4.0 | 4.0 | 4.0 | 4.0 | 4.0 | 4.0 | 4.0 | 4.0 | 4.0 | 4.0 | 4.0 | 4.0 | 4.0 | 4.0 | 4.0 | 4.0 |
| u15                                  | 5.0 | 5.0 | 5.0 | 5.0 | 5.0 | 5.0 | 4.5 | 4.5 | 4.5 | 5.0 | 4.5 | 4.5 | 5.0 | 5.0 | 5.0 | 5.0 | 5.0 | 5.0 | 5.0 | 5.0 |
| u16                                  | 5.0 | 5.0 | 4.5 | 4.5 | 5.0 | 5.0 | 4.0 | 5.0 | 3.5 | 4.0 | 5.0 | 3.0 | 5.0 | 4.5 | 4.0 | 4.5 | 4.0 | 5.0 | 5.0 | 5.0 |
| u17                                  | 4.5 | 4.5 | 4.0 | 4.0 | 4.0 | 4.5 | 5.0 | 3.5 | 4.5 | 4.0 | 4.5 | 4.0 | 4.5 | 5.0 | 4.0 | 4.5 | 5.0 | 4.5 | 4.5 | 4.0 |
| u18                                  | 4.0 | 3.0 | 4.0 | 4.0 | 4.0 | 4.0 | 4.0 | 3.0 | 3.0 | 5.0 | 4.0 | 4.0 | 4.0 | 4.0 | 4.0 | 4.0 | 4.0 | 4.0 | 4.0 | 4.0 |
| u19                                  | 5.0 | 4.5 | 4.0 | 5.0 | 4.5 | 4.5 | 5.0 | 4.5 | 5.0 | 4.0 | 5.0 | 5.0 | 4.0 | 4.0 | 4.0 | 5.0 | 5.0 | 4.0 | 4.0 | 4.5 |
| u20                                  | 4.0 | 4.5 | 4.5 | 5.0 | 4.5 | 4.0 | 4.5 | 5.0 | 4.5 | 4.0 | 5.0 | 4.5 | 5.0 | 4.0 | 3.5 | 5.0 | 4.0 | 3.5 | 3.5 | 4.0 |
| u21                                  | 5.0 | 5.0 | 5.0 | 5.0 | 5.0 | 5.0 | 5.0 | 4.0 | 5.0 | 5.0 | 5.0 | 4.5 | 5.0 | 5.0 | 5.0 | 5.0 | 5.0 | 5.0 | 4.5 | 5.0 |
| u22                                  | 4.5 | 4.5 | 5.0 | 5.0 | 4.5 | 4.5 | 4.5 | 4.0 | 4.0 | 4.5 | 4.5 | 5.0 | 5.0 | 5.0 | 4.5 | 4.5 | 4.5 | 4.5 | 5.0 | 5.0 |
| u23                                  | 5.0 | 5.0 | 4.5 | 5.0 | 4.5 | 5.0 | 5.0 | 4.5 | 5.0 | 4.5 | 5.0 | 4.0 | 5.0 | 5.0 | 4.0 | 5.0 | 4.5 | 5.0 | 5.0 | 5.0 |
| u24                                  | 4.5 | 4.5 | 4.5 | 4.5 | 4.5 | 4.5 | 4.5 | 4.0 | 3.5 | 5.0 | 4.0 | 3.5 | 4.0 | 4.0 | 4.0 | 4.5 | 3.5 | 4.0 | 4.0 | 4.5 |
| u25                                  | 4.0 | 3.5 | 4.0 | 4.5 | 4.0 | 4.0 | 4.0 | 3.5 | 4.0 | 4.5 | 4.0 | 3.5 | 3.5 | 4.0 | 3.5 | 4.5 | 3.5 | 4.0 | 4.0 | 5.0 |
| u26                                  | 4.5 | 3.0 | 2.0 | 4.0 | 4.0 | 4.0 | 3.5 | 4.5 | 4.0 | 4.5 | 4.5 | 3.0 | 4.0 | 4.5 | 5.0 | 5.0 | 4.5 | 4.5 | 5.0 | 4.5 |
| u27                                  | 4.0 | 4.0 | 4.0 | 5.0 | 3.5 | 3.5 | 4.5 | 4.5 | 5.0 | 4.0 | 5.0 | 4.0 | 4.0 | 4.0 | 3.5 | 4.0 | 5.0 | 5.0 | 5.0 | 5.0 |
| u28                                  | 5.0 | 5.0 | 5.0 | 5.0 | 5.0 | 5.0 | 5.0 | 5.0 | 5.0 | 5.0 | 5.0 | 4.0 | 5.0 | 5.0 | 5.0 | 5.0 | 5.0 | 5.0 | 5.0 | 5.0 |
| u29                                  | 3.5 | 4.5 | 4.0 | 5.0 | 4.0 | 4.5 | 4.5 | 3.5 | 3.5 | 4.0 | 4.0 | 2.5 | 3.0 | 3.5 | 3.0 | 3.5 | 3.5 | 4.0 | 3.0 | 3.5 |
| u30                                  | 3.5 | 3.0 | 3.0 | 3.0 | 3.0 | 2.5 | 1.5 | 3.0 | 4.0 | 3.5 | 2.0 | 3.5 | 4.0 | 3.5 | 4.0 | 4.5 | 3.5 | 3.5 | 3.5 | 4.0 |

Table 3. The scores for the audio-visual results of the compression-decompression method.
